# Supplementary material
Source: PubMed Central journal article supplement (PMC4187849)
Supplement: IAI.01893-14_zii999090905so1.pdf [file IAI.01893-14_zii999090905so1.pdf]

FIG S1

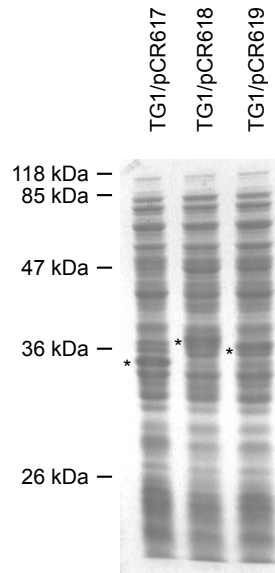

**FIG S1. Expression of Cfp4 fragments fused to GST in *E. coli*.** Fragments of Cfp4 were fused in frame to the C-terminus of GST using vector pGEX2 and transformed into *E. coli* strain TG1. Fusion protein expression was induced for 3 hours by addition of 0.5  $\mu$ M isopropyl- $\beta$ -D-thiogalactopyranoside (IPTG). Cellular lysates were prepared from bacterial cells by boiling of cells in 1X Laemmli sample buffer. Lysate proteins were separated by SDS-polyacrylamide gel electrophoresis using 13% acrylamide. Proteins were visualized by Coomassie staining. Asterisks indicate unique protein bands representing the GST:Cfp4 fusions encoded on plasmids pCR617 (amino acids 70-113), pCR618 (amino acids 98-202), and pCR619 (amino acids 87-169).

FIG S2

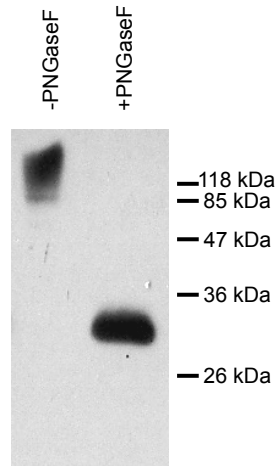

**FIG S2. Anti-Cfp4 immunoblot of wild-type *Histoplasma* yeast culture filtrates.** Culture filtrate proteins (with and without prior deglycosylation with PNGaseF) were separated by electrophoresis through 12% acrylamide and transferred to nitrocellululose. Cfp4 protein was visualized by immunoblot with 2D20 monoclonal antibody to Cfp4

FIG S3

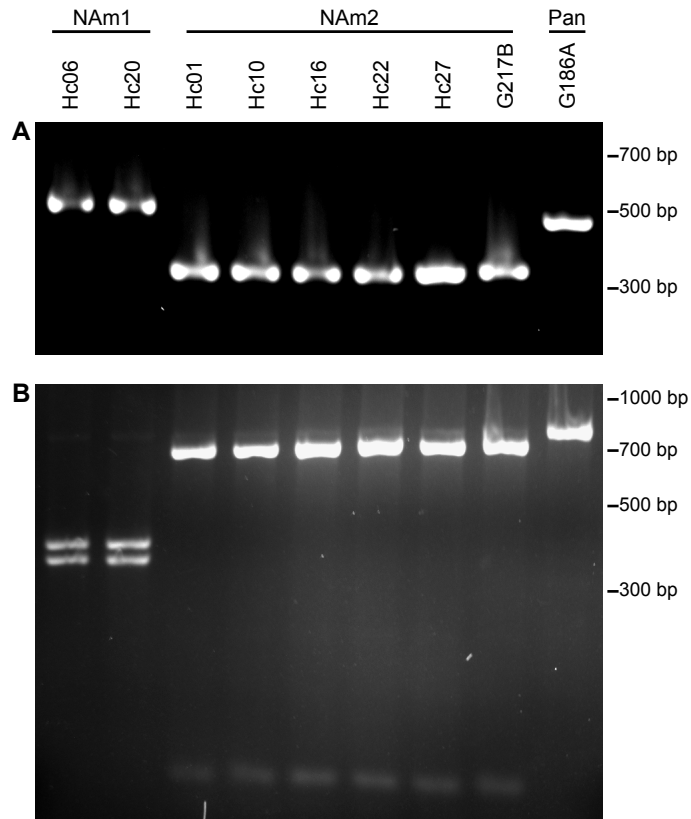

**FIG S3. Classification of North American clinical *Histoplasma* isolates by sequence polymorphisms.** Genomic DNA was prepared from clinical isolates Hc06, Hc20, Hc01, Hc10, Hc16, Hc22, Hc27 obtained from the OSU Medical Center. Strains were assigned to North American type 1 (NAM1) or type 2 (NAM2) phylogenetic groups by lineage-specific nucleotide sequence polymorphisms following PCR-based amplification of the *YPS3* and *SOD3* loci. **(A)** PCR size polymorphisms in the *YPS3* gene were used to assign isolates to NAM1 (630 bp) or NAM2 (339 bp). Panama classification also shown using the Panama strain G186A. **(B)** PCR-RFLP polymorphisms in the *SOD3* gene were based on lineage-specific *Xho*I restriction sites in a 772-775 bp *SOD3* amplicon. *Xho*I-digested PCR amplicons were predicted to generate the following fragments: NAM1 (1 *Xho*I site yielding 358 bp and 417 bp fragments), NAM2 (1 *Xho*I site yielding 62 bp and 712 bp fragments), and Panama (no *Xho*I site yielding a 772 bp product).
